# Supplementary material for: FBXO28 promotes proliferation, invasion, and metastasis of pancreatic cancer cells through regulation of SMARCC2 ubiquitination
Source: publisher site journal article supplement (doi:10.18632/aging.204780), 2023-06-21
Supplement: Supplementary file [file aging-v15i12-204780-supplementary-material-SD1.pdf]

## SUPPLEMENTARY FIGURE

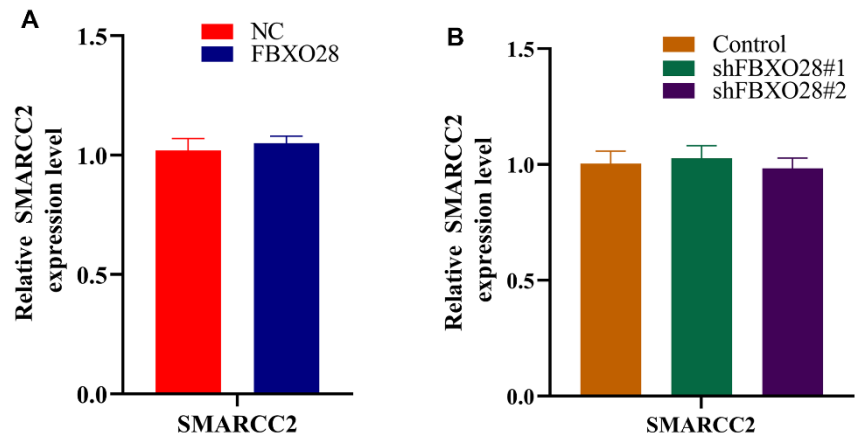

**Supplementary Figure 1. Relative SMARCC2 expression level.** (A, B) No significant change in SMARCC2 mRNA expression by overexpression or downregulation of FBXO28.
